# Supplementary material for: Water-soluble magnetic CoO nanocrystals functionalized with surfactants as T2-weighed MRI contrast agents in vitro
Source: Royal Society of Chemistry journal article supplement (doi:10.1039/c1dt10107b), 2011-01-01
Supplement: c1dt10107b.pdf [file c1dt10107b.pdf]

## Supporting Information

### **Water Soluble Magnetic CoO Nanocrystals Functionalized with Surfactants as $T_2$ -weighed MRI Contrast Agents *in Vitro***

**Hong Yang, Hong Zhou, Cuixia Zhang, Xuejian Li, He Hu, Huixia Wu, Shiping Yang<sup>a\*</sup>**

*The Key Laboratory of Resource Chemistry of ministry of Education, College of Life and Environmental Science, Shanghai Normal University, 100 Guilin Road, Shanghai 200234, P. R. China. Fax: +86-21-64322511; Tel: +86-21-64322346;*

*E-mail: shipingy@shnu.edu.cn*

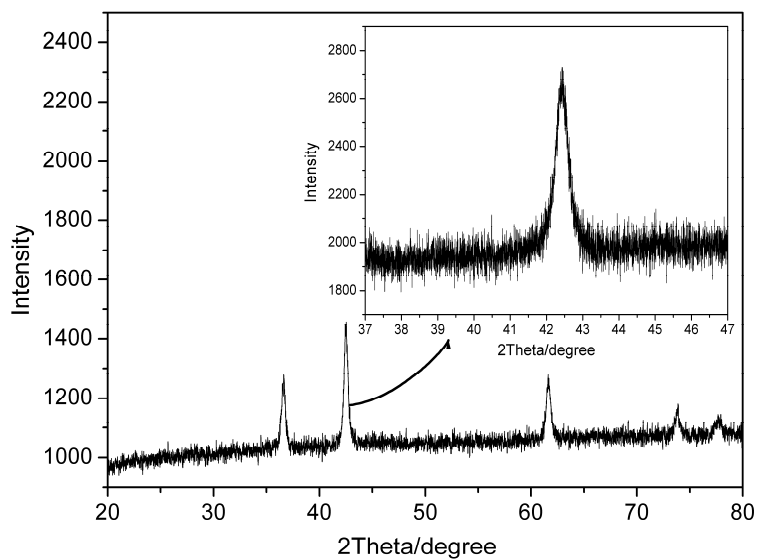

Figure S1. X-ray diffraction (XRD) patterns of as-synthesized CoO NPs. Inset: X-ray diffraction (XRD) patterns of as-synthesized CoO NPs measured from 37 to 47 degree.

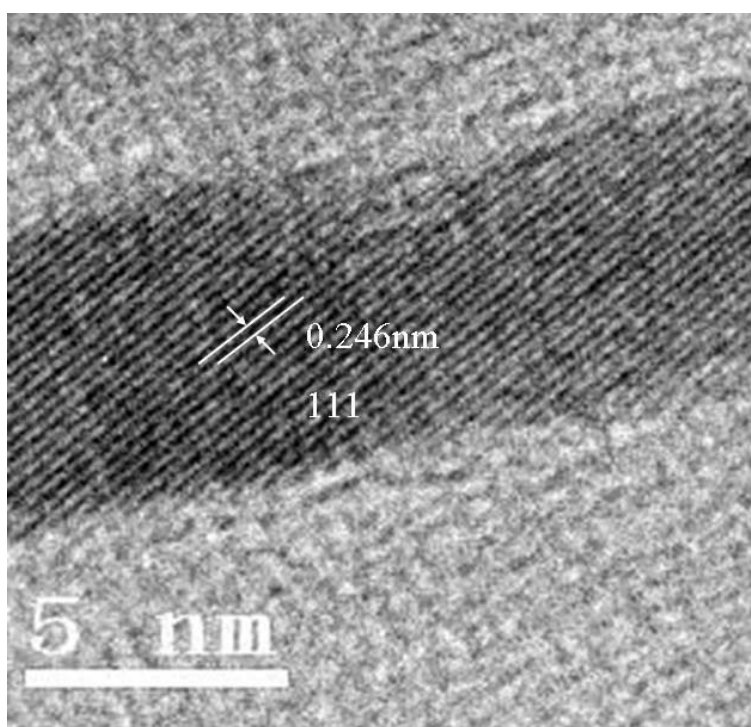

Figure S2. The high-resolution TEM image of as-synthesized CoO NPs.

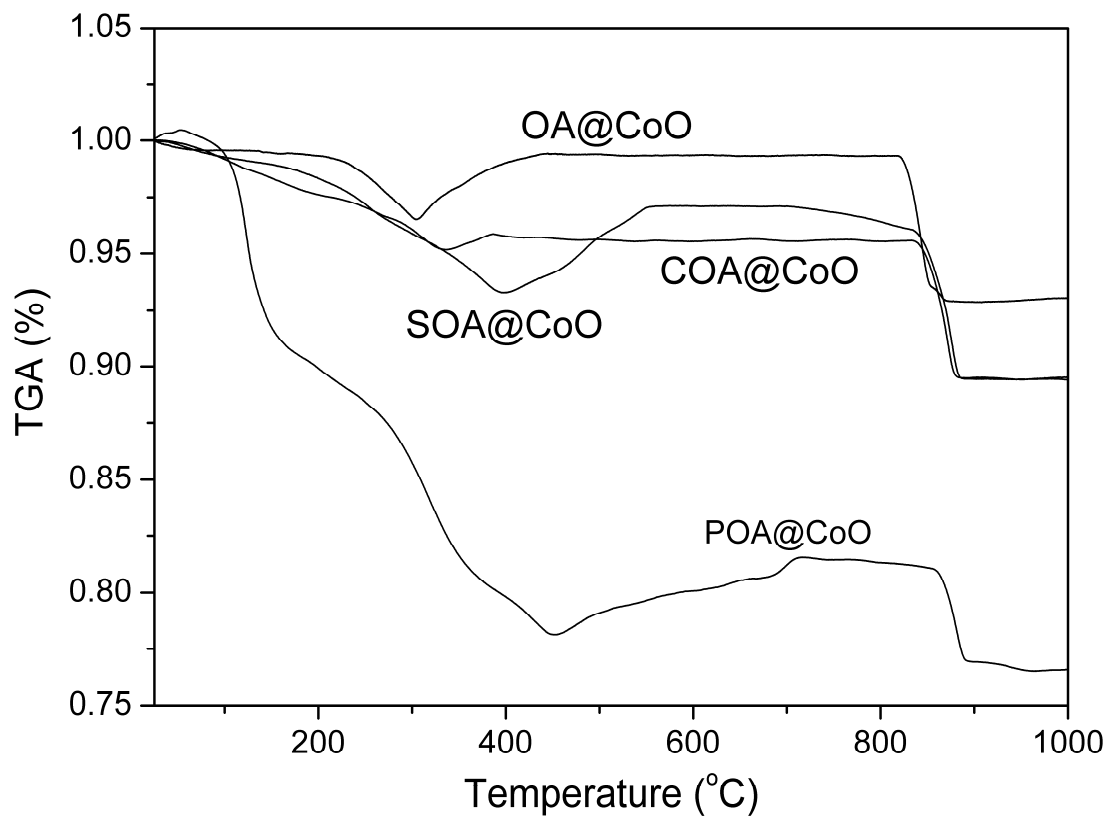

Figure S3. The thermogravimetric analysis of oleic acid-capped CoO nanocrystals, COA@CoO, POA@CoO and SOA@CoO.

|                                | Diam. (nm)           | % Intensity | Width (nm) |
|--------------------------------|----------------------|-------------|------------|
| <b>Z-Average (d.nm):</b> 149.4 | <b>Peak 1:</b> 169.7 | 98.1        | 72.02      |
| <b>Pdl:</b> 0.181              | <b>Peak 2:</b> 4613  | 1.9         | 822.1      |
| <b>Intercept:</b> 0.970        | <b>Peak 3:</b> 0.000 | 0.0         | 0.000      |

**Result quality :** Good

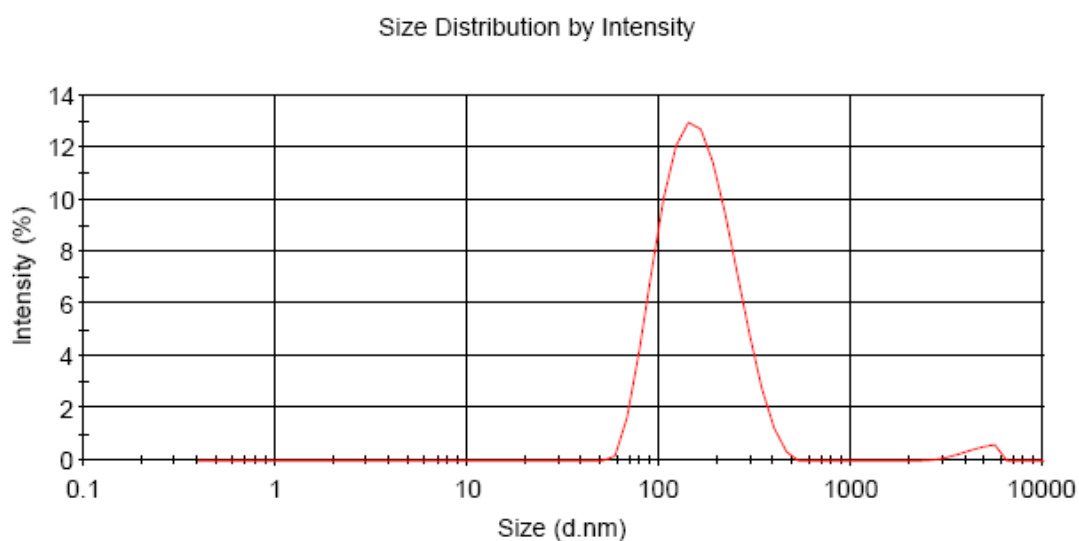

Figure S4. Dynamic light scattering (DLS) of COA@CoO.

|                                | Diam. (nm)           | % Intensity | Width (nm) |
|--------------------------------|----------------------|-------------|------------|
| <b>Z-Average (r.nm):</b> 435.9 | <b>Peak 1:</b> 316.3 | 90.6        | 71.02      |
| <b>Pdl:</b> 0.483              | <b>Peak 2:</b> 104.2 | 9.4         | 13.97      |
| <b>Intercept:</b> 0.990        | <b>Peak 3:</b> 0.000 | 0.0         | 0.000      |
| <b>Result quality</b> Good     |                      |             |            |

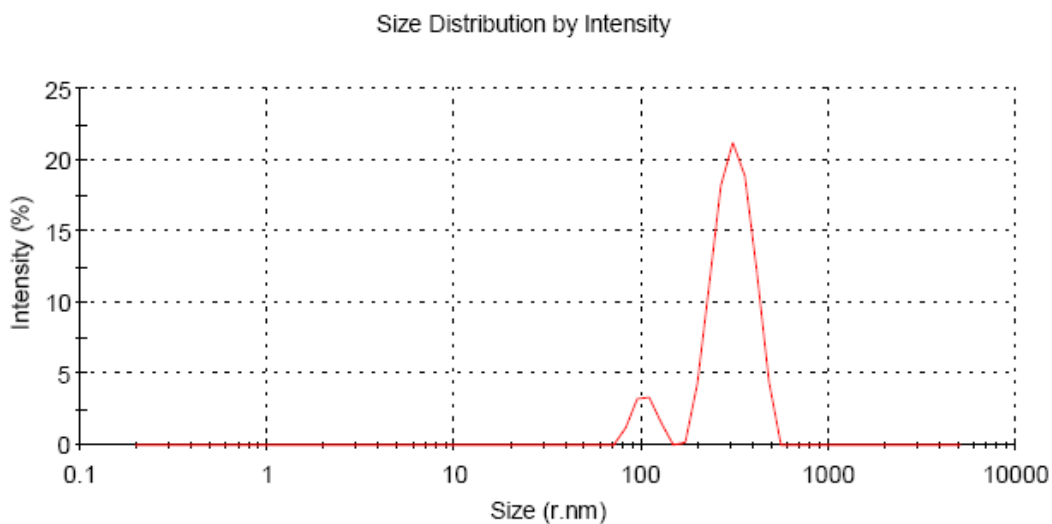

Figure S5. Dynamic light scattering (DLS) of SOA@CoO.

|                                | Diam. (nm)           | % Intensity | Width (nm) |
|--------------------------------|----------------------|-------------|------------|
| <b>Z-Average (r.nm):</b> 238.4 | <b>Peak 1:</b> 231.9 | 96.8        | 86.89      |
| <b>Pdl:</b> 0.313              | <b>Peak 2:</b> 2665  | 3.2         | 186.4      |
| <b>Intercept:</b> 0.956        | <b>Peak 3:</b> 0.000 | 0.0         | 0.000      |
| <b>Result quality</b> Good     |                      |             |            |

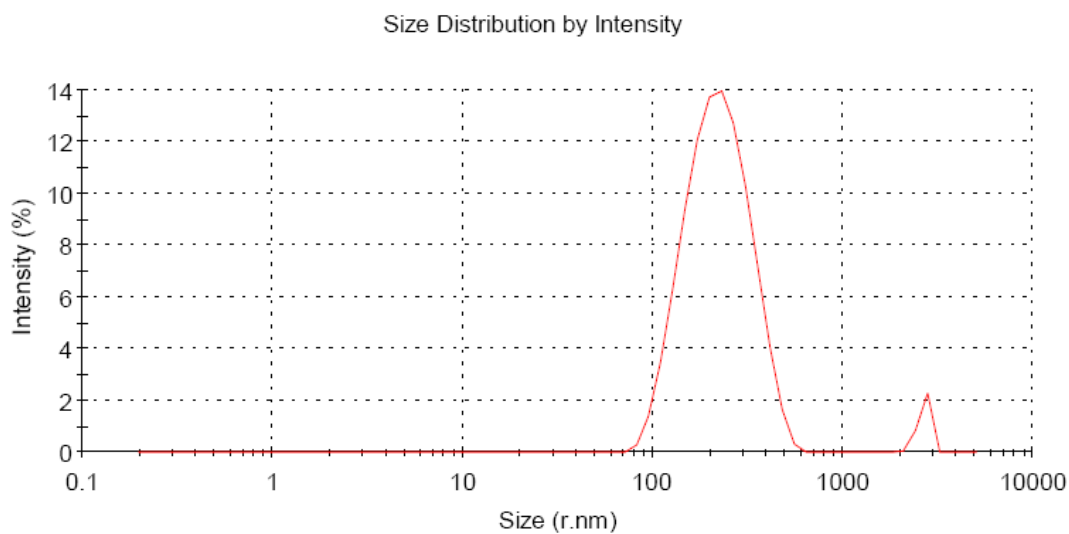

Figure S6. Dynamic light scattering (DLS) of POA@CoO.

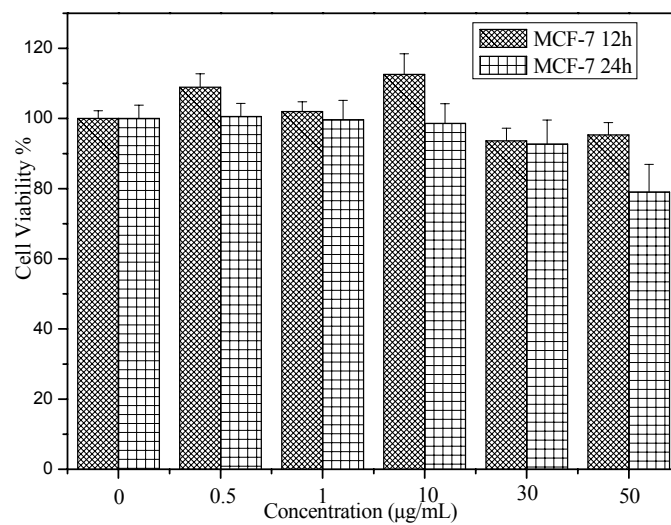

Figure S7. Cell viability values (%) of MCF-7 cells estimated by MTT assay incubated with 0.5-50 µg/mL POA@CoO at 37 °C for 12 h and 24 h, respectively.
